# Supplementary material
Source: PubMed Central journal article supplement (PMC3261374)
Supplement: NIHMS335958-supplement-3.pdf [file NIHMS335958-supplement-3.pdf]

Supplemental Digital Content Legend:

SDC 1. Nontypeable *Haemophilus influenzae* (NTHi) colonization rates of infants and caregivers according to the infants' health status. (figure)

SDC 2. Minimum inhibitory concentrations (MIC) and beta-lactamase production of nontypeable *Haemophilus influenzae* isolates cultured from infants. (figure)

- Beta-lactamase negative
- Beta-lactamase positive
